# Supplementary material for: Impact of disease activity patterns on health-related quality of life (HRQoL) in patients with systemic lupus erythematosus (SLE)
Source: PubMed Central journal article supplement (PMC11288148; doi:10.1136/lupus-2024-001202), 2024-07-29
Supplement: lupus-11-2-s001.pdf [file lupus-11-2-s001.pdf]

**Table S1.** Disease activity during one and three years before enrollment in chronically active and relapsing-remitting disease groups.

|                             | Mean number<br>of visits with<br>active disease<br>( $\pm$ SD) | Mean total<br>number of<br>visits<br>( $\pm$ SD) | Mean SELENA-<br>SLEDAI in visits<br>with active disease<br>( $\pm$ SD) | Mean PGA in<br>visits with<br>active disease<br>( $\pm$ SD) |
|-----------------------------|----------------------------------------------------------------|--------------------------------------------------|------------------------------------------------------------------------|-------------------------------------------------------------|
| CA 1 year<br>(34 patients)  | 3.03 $\pm$ 1.29                                                | 3.03 $\pm$ 1.29                                  | 4.97 $\pm$ 2.3                                                         | 1 $\pm$ 0.34                                                |
| CA 3 years<br>(8 patients)  | 8.33 $\pm$ 3.14                                                | 8.33 $\pm$ 3.14                                  | 4.41 $\pm$ 2.19                                                        | 1.06 $\pm$ 0.34                                             |
| RR 1 year<br>(53 patients)  | 1.33 $\pm$ 0.67                                                | 3.19 $\pm$ 0.91                                  | 5.51 $\pm$ 2.67                                                        | 1.05 $\pm$ 0.4                                              |
| RR 3 years<br>(92 patients) | 2.31 $\pm$ 1.53                                                | 7.38 $\pm$ 2.1                                   | 5.3 $\pm$ 2.47                                                         | 1.04 $\pm$ 0.39                                             |
