# Supplementary material for: Impact of disease activity patterns on health-related quality of life (HRQoL) in patients with systemic lupus erythematosus (SLE)
Source: PubMed Central journal article supplement (PMC11288148; doi:10.1136/lupus-2024-001202), 2024-07-29
Supplement: lupus-11-2-s002.pdf [file lupus-11-2-s002.pdf]

**Table S2.** Association between SLICC-DI and PROs, after adjusting for fibromyalgia.

|           | Coef.     | p-value               | [95% Conf. Interval] |
|-----------|-----------|-----------------------|----------------------|
| SF-36 PCS | Coef -.04 | <b><i>p=0.000</i></b> | -.066 - .026         |
| FACIT     | Coef -.04 | <b><i>p=0.000</i></b> | -.067 - -.024        |
| LIT       | Coef .02  | <b><i>p=0.000</i></b> | .01 - .03            |
| HADS-A    | Coef .06  | <b><i>p=0.03</i></b>  | .004 - .11           |
| HADS-D    | Coef .08  | <b><i>p=0.008</i></b> | .021 - .14           |
